# Supplementary material for: Mechanisms for Hfq-Independent Activation of rpoS by DsrA, a Small RNA, in Escherichia coli
Source: PubMed Central journal article supplement — Mol Cells. 2019 Apr 19;42(5):426–39. doi: 10.14348/molcells.2019.0040 (PMC6537650; doi:10.14348/molcells.2019.0040), 2019-04-19
Supplement: molce-42-426_Suppl.pdf [file molce-42-426_Suppl.pdf]

Supplementary Table S1. Oligonucleotides used in this study

| Name                                     | Sequence (5' to 3')                          |
|------------------------------------------|----------------------------------------------|
| <b><i>For Northern blotting</i></b>      |                                              |
| DsrA_NP                                  | GTTACACCAGGAAATCTGATGTGTT                    |
| lacZsdR1939                              | TATTCGCTGGTCACTTCGATGG                       |
| rpoS_NP                                  | CTTCATTTAAATCATGAACTTTCAGCGTATTCTGACTCAT     |
| <b><i>For in vitro transcription</i></b> |                                              |
| DsrA_F_T7                                | TAATACGACTCACTATAGGAACACATCAGATTTCTGGTG      |
| DsrA_R                                   | AAATCCCGACCCTGAGGGGG                         |
| lacZsdF1713_T7                           | GTGTAATACGACTCACTATAGGGGTCTGGGACTGGGTGGATCAG |
| lacZsdR1978                              | AAATCCCGACCCTGAGGGGG                         |
| <b><i>For qRT-PCR</i></b>                |                                              |
| rpoS:5'ORF_FW                            | GAAGATGCGGAATTTGATGAGAAC                     |
| rpoS:5'ORF_RV                            | AGTTCCTCTTCGGCCAAATC                         |
| rpoS:ORF_FW                              | ACCCGTACTATTCGTTTGCC                         |
| rpoS:ORF_RV                              | ATCTCTCCGCACTTGGTTC                          |
| lacZsdF1713                              | GTCTGGGACTGGGTGGATCAG                        |
| lacZsdR1939                              | TATTCGCTGGTCACTTCGATGG                       |
| rrsA_968F                                | AACGCGAAGAACCTTAC                            |
| rrsA_1387R                               | CGGTGTGTACAAGGCCCGGG                         |

Supplementary Table S2. Half-lives of the *rpoS* mRNA

| strain                  | Half-lives (min) <sup>a</sup> |             |
|-------------------------|-------------------------------|-------------|
|                         | Vector                        | pDsrA       |
| <i>hfq</i> <sup>+</sup> | 1.26 ± 0.42                   | 2.08 ± 0.58 |
| <i>hfq</i> <sup>-</sup> | 0.83 ± 0.16                   | 1.69 ± 0.52 |

<sup>a</sup>Half-lives were determined by linear regression analysis from the data presented in Supplementary Figure S3. We assumed that the disappearance of *rpoS* mRNA after rifampicin treat followed a first-order decay. Values are means ± SD for three independent experiments.

Supplementary Figure S1

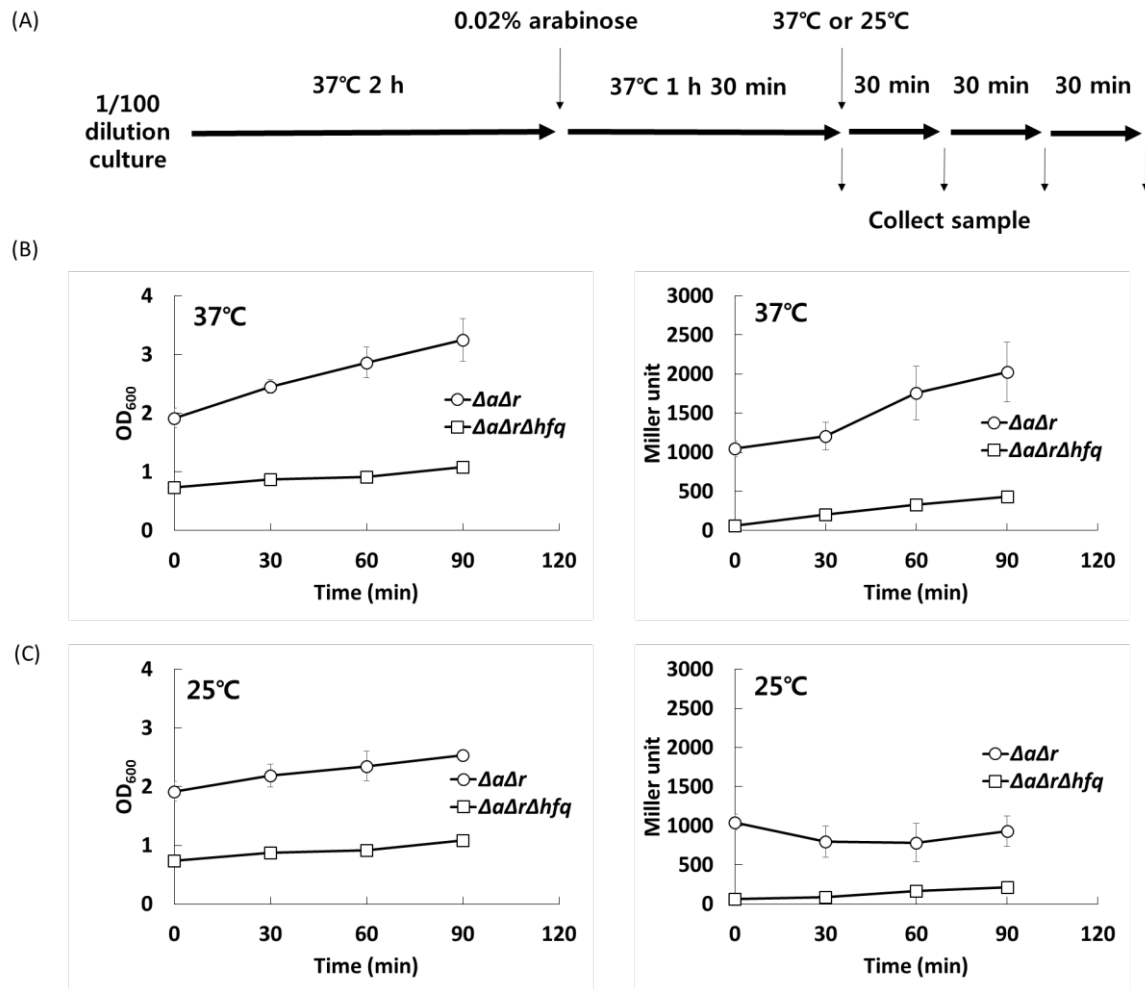

Figure S1. Up-regulation of *rpoS* translation by endogenous DsrA in *hfq*<sup>+</sup> and *hfq*<sup>-</sup> cells. (A) Schematic diagram of experimental conditions. Three colonies for each strain were cultured in LB medium containing ampicillin (100  $\mu\text{g mL}^{-1}$ ) and the overnight culture was diluted to 1:100 and cultured with the fresh medium. 0.02% arabinose at 37°C and IPTG were added at 2 h and 3.5 h, respectively, and the culture was incubated further for 30 min and 60 min at 37°C or 25°C. Cells grown at 37°C (B) and 25°C (C) were assayed for LacZ activity (Miller unit). The OD<sub>600</sub> of cell cultures was also measured. The indicated values were calculated from at least three independent experiments (error bars represent standard deviation).  $\Delta\alpha\Delta r$ , *arcZ dsrA*<sup>+</sup> *rprA*<sup>-</sup> *hfq*<sup>+</sup>;  $\Delta\alpha\Delta r\Delta hfq$ , *arcZ dsrA*<sup>+</sup> *rprA*<sup>-</sup> *hfq*<sup>-</sup>.

Supplementary Figure S2

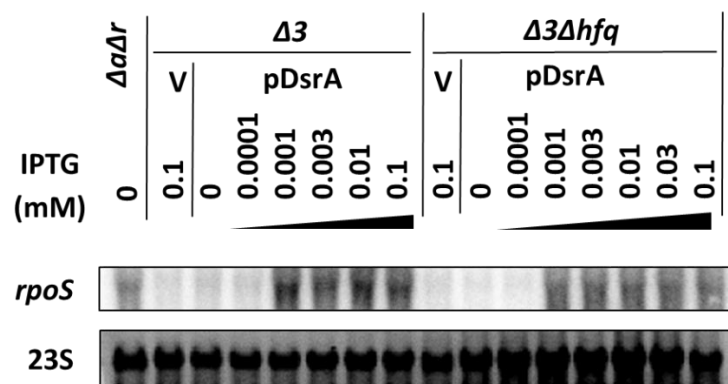

Figure S2. Northern analysis of effects of DsrA on *rpoS* mRNA accumulation in  $\Delta 3$  and  $\Delta 3\Delta hfq$  cells. Total cellular RNA was prepared from IPTG-treated cells grown at 37°C, and subjected to Northern blot analysis. Cells containing pDsrA were treated with IPTG at increasing concentrations from 0 to 0.1 mM. The *rpoS* mRNA was probed with an anti-*rpoS* ORF oligonucleotide and the 23S rRNA was detected as a loading control.  $\Delta 3$ , *arcZ dsrA<sup>-</sup> rprA<sup>-</sup> hfq<sup>+</sup>*;  $\Delta 3\Delta hfq$ , *arcZ dsrA<sup>-</sup> rprA<sup>-</sup> hfq<sup>-</sup>*;  $\Delta a\Delta r$ , *arcZ dsrA<sup>+</sup> rprA<sup>-</sup> hfq<sup>+</sup>*; V, vector control.

Supplementary Figure S3

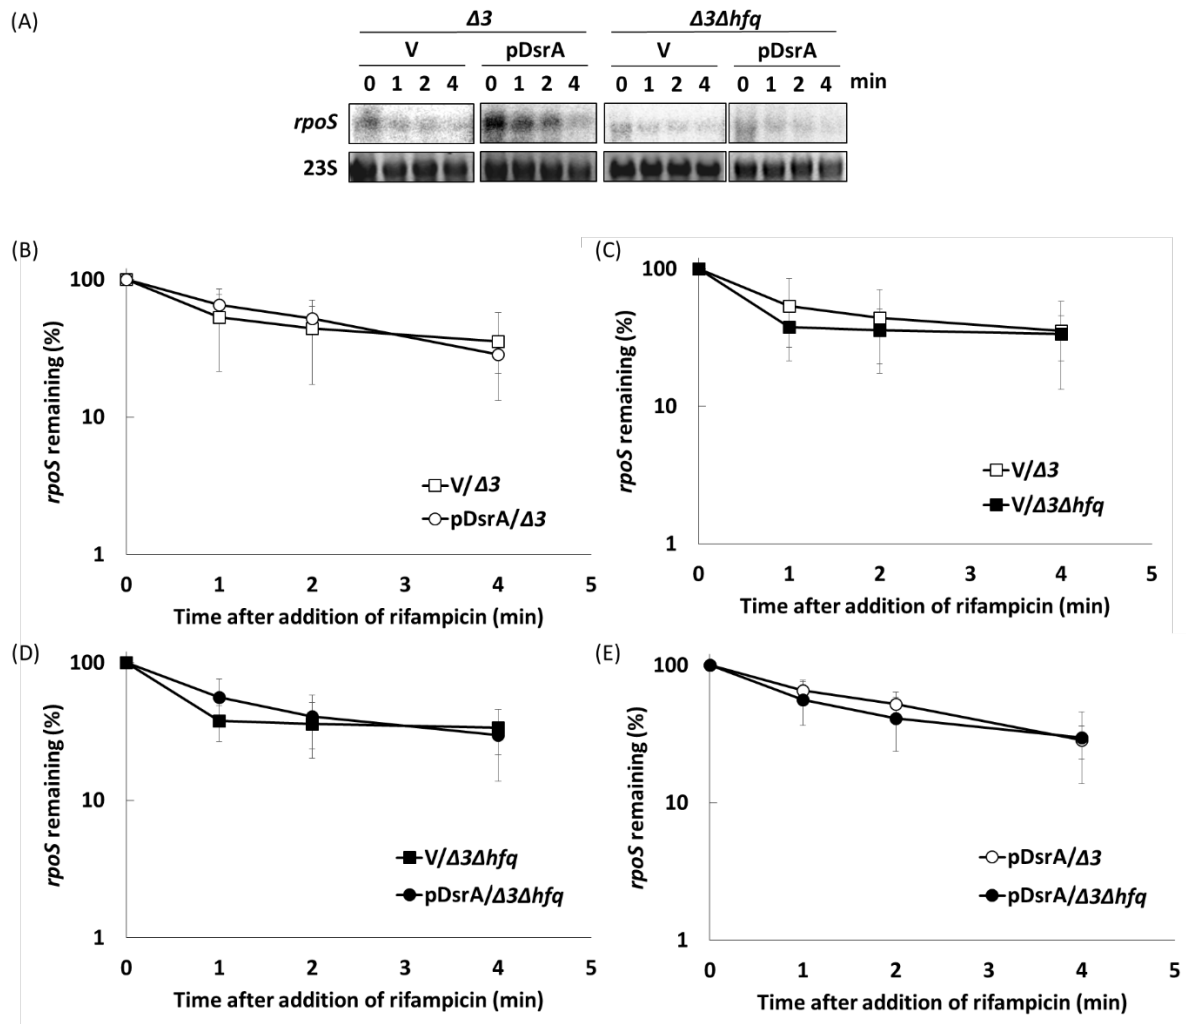

Fig. S3. Effects of DsrA on the stability of the *rpoS* mRNA in *hfq*<sup>+</sup> and *hfq*<sup>-</sup> cells. Total cellular RNA was prepared from 0.1 mM IPTG-induced DsrA-expressing cells grown at 37°C, at the indicated times after rifampicin treatment. (A) Cellular levels of *rpoS* mRNA were measured using Northern blot analysis. *rpoS* mRNA was probed with an anti-*rpoS* oligonucleotide and the 23S rRNA was detected as a loading control. (B to E) The % *rpoS* mRNA remaining was plotted on a semi-log scale as a function of time. Values are means  $\pm$  SD; n = 3. PM1409 $\Delta 3$  cells containing control vector and pDsrA (B), PM1409 $\Delta 3$  and PM1409 $\Delta 3\Delta hfq$  cells containing control vector (C), PM1409 $\Delta 3\Delta hfq$  cells containing control vector and pDsrA (D), and PM1409 $\Delta 3$  and PM1409 $\Delta 3\Delta hfq$  cells containing pDsrA (E).  $\Delta 3$ , *arcZ dsrA<sup>-</sup> rprA<sup>-</sup> hfq<sup>+</sup>*;  $\Delta 3\Delta hfq$ , *arcZ dsrA<sup>-</sup> rprA<sup>-</sup> hfq<sup>-</sup>*; V, vector control. At least three independent measurements were performed for each strain (error bars represent standard deviation).

Supplementary Figure S4

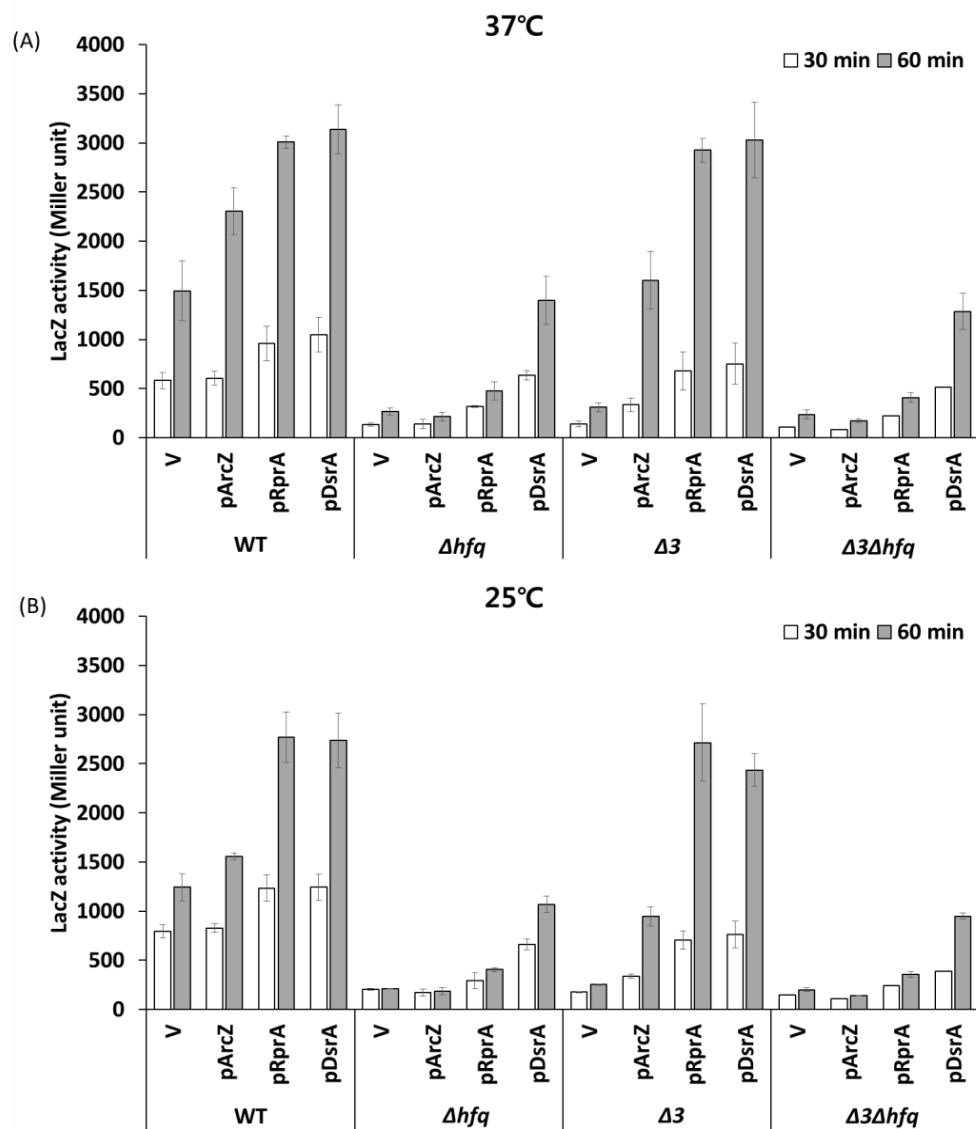

Fig. S4. Stimulation of *rpoS* translation by DsrA overexpression in the absence of Hfq at 37°C and 25°C. Cells were cultured with following condition and LacZ activity was measured. Three colonies for each strain were cultured in LB medium containing ampicillin ( $100 \mu\text{g mL}^{-1}$ ) and the overnight culture was diluted to 1:100 and cultured with the fresh medium. 0.02% arabinose at 37°C and IPTG were added at 2 h and 3.5 h, respectively, and the culture was incubated further for 30 min and 60 min at 37°C or 25°C. *rpoS* activation by overexpression of sRNAs in WT,  $\Delta hfq$ ,  $\Delta 3$  and  $\Delta 3\Delta hfq$  (lacking all three *rpoS*-activating sRNAs) was assayed by LacZ expression. Cells grown at 37°C (A), and 25°C (B). Control vector, pHMB1 (V). Plasmids pArcZ, pRprA, and pDsrA overexpress DsrA, RprA, and ArcZ, respectively. WT,  $arcZ^+ dsrA^+ rprA^+ hfq^+$ ;  $\Delta hfq$ ,  $arcZ^+ dsrA^+ rprA^+ hfq^-$ ;  $\Delta 3$ ,  $arcZ^- dsrA^- rprA^- hfq^+$ ;  $\Delta 3\Delta hfq$ ,  $arcZ^- dsrA^- rprA^- hfq^-$ .

Supplementary Figure S5

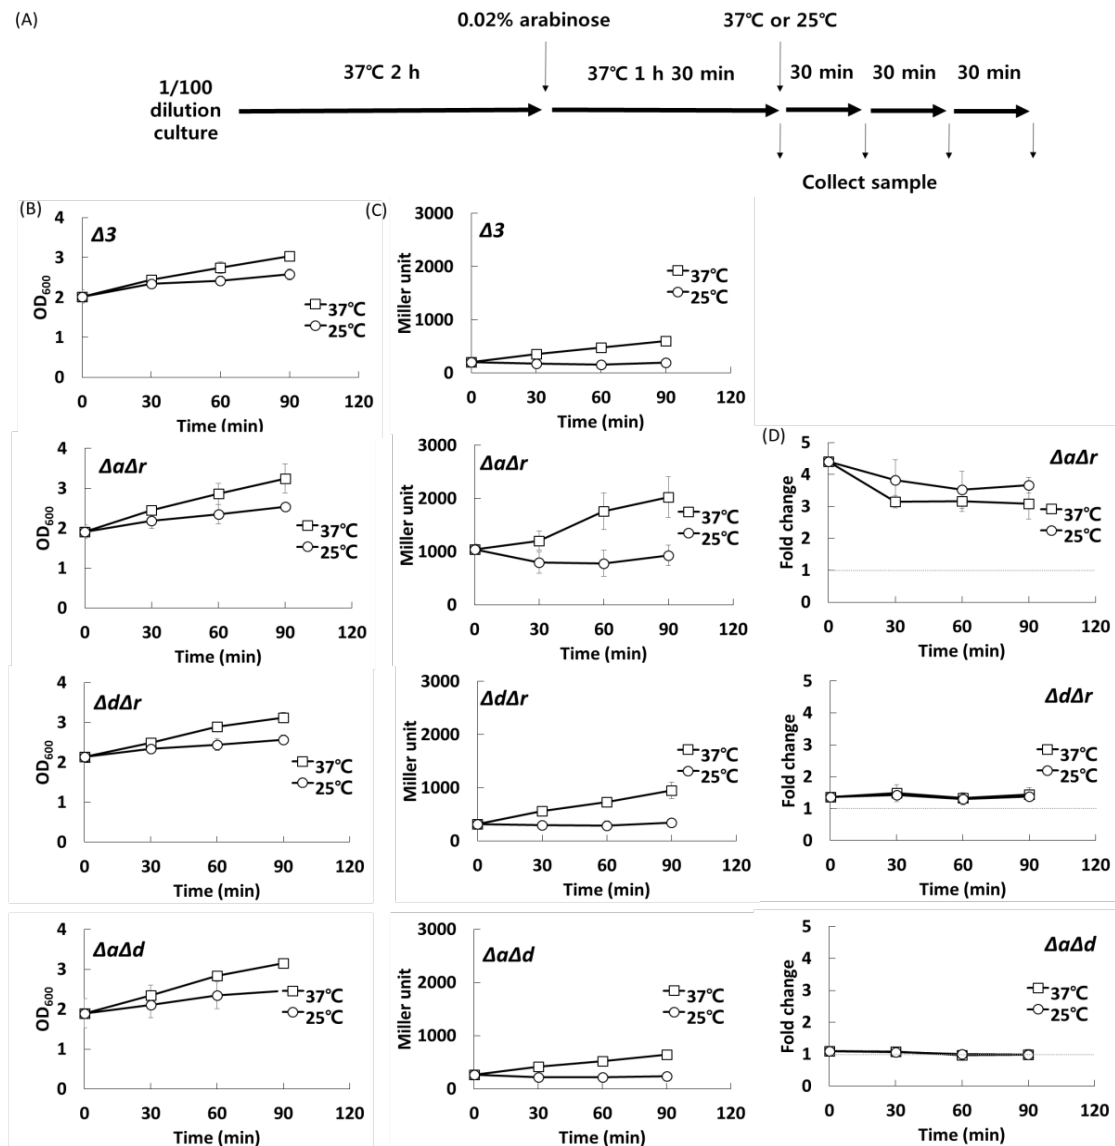

Figure S5. Up-regulation of *rpoS* translation by endogenous *rpoS*-activating sRNAs at 37°C and 25°C. (A) Schematic diagram of experimental conditions. Three colonies for each strain were cultured in LB medium containing ampicillin ( $100 \mu\text{g mL}^{-1}$ ) and the overnight culture was diluted to 1:100 and cultured with the fresh medium. 0.02% arabinose at 37°C and IPTG were added at 2 h and 3.5 h, respectively, and the culture was incubated further for 30 min and 60 min at 37°C or 25°C. Cells grown at 37°C (B) and 25°C (C) were assayed for LacZ activity (Miller unit). The OD<sub>600</sub> of cell cultures was also measured. OD<sub>600</sub> values (B), LacZ activity (C), and fold changes in LacZ activities of cells expressing only one *rpoS*-activating sRNA relative to  $\Delta 3$  cells (D). The indicated values were calculated from at least three independent experiments (error bars represent standard deviation).  $\Delta 3$ , *arcZ dsrA<sup>-</sup> rprA<sup>-</sup> hfq<sup>+</sup>*;  $\Delta a\Delta r$ , *arcZ dsrA<sup>+</sup> rprA<sup>-</sup> hfq<sup>+</sup>*;  $\Delta a\Delta d$ , *arcZ dsrA<sup>-</sup> rprA<sup>+</sup> hfq<sup>+</sup>*;  $\Delta d\Delta r$ , *arcZ<sup>+</sup> dsrA<sup>-</sup> rprA<sup>-</sup> hfq<sup>+</sup>*.
